# Supplementary material for: Complete genome sequence and analysis of Alcaligenes faecalis strain Mc250, a new potential plant bioinoculant
Source: PLoS One. 2020 Nov 5;15(11):e0241546. doi: 10.1371/journal.pone.0241546 (PMC7643998; doi:10.1371/journal.pone.0241546)
Supplement: S2 Table — (XLSX) [file pone.0241546.s006.xlsx]

## Sheet: GIs
S2 Table. Genome islands features
Island 1	483.055	506.629
GenBank Locus Tag	start	end	annotation	comment
DUD43_02195	483055	483501	TRAP transporter small permease
DUD43_02200	483502	484794	TRAP transporter large permease
DUD43_02205	484866	486239	amidase
DUD43_02210	486323	486976	GntR family transcriptional regulator
DUD43_02215	487233	488060	ammonia-dependent NAD(+) synthetase
DUD43_02220	488214	488285	incomplete; partial in the middle of a contig; missing start and stop; peptidoglycan-bound protein	pseudogene
DUD43_02225	488777	489841	AI-2E family transporter
DUD43_02230	490150	490234	tRNA-Leu
DUD43_02235	490915	492585	ATPase	specific Mc250
DUD43_02240	493009	493926	hypothetical protein
DUD43_02245	494057	494602	hypothetical protein	specific Mc250
DUD43_02250	494688	495242	hypothetical protein	specific Mc250
DUD43_02255	495304	495726	hypothetical protein	specific Mc250
DUD43_02260	496261	497487	MFS transporter	specific Mc250
DUD43_02265	497591	498520	LysR family transcriptional regulator
DUD43_02270	498630	499823	chromate transporter
DUD43_02275	499942	501504	phosphonate monoester hydrolase
DUD43_02280	501523	502500	ABC transporter substrate-binding protein
DUD43_02285	502602	503123	MarR family transcriptional regulator
DUD43_02290	503218	504219	oxidoreductase
DUD43_02295	504273	504881	GNAT family N-acetyltransferase
DUD43_02300	504908	506629	D-lactate dehydrogenase
Island 2	1,587,347	1,611,367
GenBank Locus Tag	start	end	annotation	comment
DUD43_07460	1587347	1588054	hypothetical protein
DUD43_07465	1588062	1588385	DUF1064 domain-containing protein
DUD43_07470	1588399	1588779	hypothetical protein
DUD43_07475	1588776	1589024	hypothetical protein
DUD43_07480	1589198	1589617	hypothetical protein
DUD43_07485	1589687	1590607	hypothetical protein
DUD43_07490	1590619	1591092	hypothetical protein
DUD43_07495	1591493	1594699	phage tail tape measure protein
DUD43_07500	1594880	1595155	hypothetical protein
DUD43_07505	1595152	1595628	DUF1833 domain-containing protein
DUD43_07510	1595625	1596041	hypothetical protein
DUD43_07515	1596028	1602984	hypothetical protein
DUD43_07520	1602989	1603360	hypothetical protein	specific Mc250
DUD43_07525	1603554	1603871	hypothetical protein
DUD43_07530	1604226	1604684	lysozyme
DUD43_07535	1604579	1605136	DUF2514 family protein
DUD43_07540	1605156	1605482	hypothetical protein	specific Mc250
DUD43_07545	1605597	1605806	incomplete; partial in the middle of a contig; missing start; AAA family ATPase	pseudogene
DUD43_07550	1606007	1606372	hypothetical protein
DUD43_07555	1606489	1606833	hypothetical protein
DUD43_07560	1607278	1608093	DUF4377 domain-containing protein
DUD43_07565	1608200	1608907	tellurite resistance TerB family protein
DUD43_07570	1609118	1610269	branched-chain amino acid ABC transporter substrate-binding protein
DUD43_07575	1610357	1610686	DUF3892 domain-containing protein
DUD43_07580	1610711	1611367	3'-5' exonuclease
Island 3	1,887,524	1,906,641
GenBank Locus Tag	start	end	annotation	comment
DUD43_08820	1888688	1888870	hypothetical protein	specific Mc250
DUD43_08825	1888867	1889913	NADP(H)-dependent aldo-keto reductase
DUD43_08830	1889996	1891660	amidohydrolase
DUD43_08835	1892025	1892441	YkgJ family cysteine cluster protein
DUD43_08840	1892901	1892977	tRNA-Val
DUD43_08845	1893138	1894358	DUF4102 domain-containing protein
DUD43_08850	1894375	1894599	transcriptional regulator
DUD43_08855	1894596	1895069	class I SAM-dependent methyltransferase
DUD43_08860	1895087	1896559	HNH endonuclease	specific Mc250
DUD43_08865	1896823	1897542	hypothetical protein
DUD43_08870	1897532	1898434	recombination-associated protein RdgC
DUD43_08875	1898597	1898839	hypothetical protein	specific Mc250
DUD43_08880	1898930	1899406	ssb; single-stranded DNA-binding protein	specific Mc250
DUD43_08885	1899407	1900042	exonuclease
DUD43_08885	1899407	1900042	exonuclease
DUD43_08895	1900787	1901854	hypothetical protein
DUD43_08900	1902133	1902492	hypothetical protein
DUD43_08905	1902729	1903043	hypothetical protein
DUD43_08910	1903912	1905030	hypothetical protein	specific Mc250
DUD43_08915	1905208	1905582	hypothetical protein	specific Mc250
DUD43_08920	1905661	1906641	hypothetical protein	specific Mc250
Island 4	1,915,855	1,962,478
GenBank Locus Tag	start	end	annotation	comment
DUD43_09000	1915855	1917330	DNA-packaging protein
DUD43_09005	1917335	1918759	DUF4055 domain-containing protein
DUD43_09010	1918772	1919518	hypothetical protein
DUD43_09015	1919615	1920589	hypothetical protein
DUD43_09020	1920634	1920987	hypothetical protein	specific Mc250
DUD43_09025	1920997	1921509	hypothetical protein	specific Mc250
DUD43_09030	1921511	1921903	hypothetical protein
DUD43_09035	1921905	1922960	hypothetical protein	specific Mc250
DUD43_09035	1921905	1922960	hypothetical protein	specific Mc250
DUD43_09045	1923346	1923825	hypothetical protein
DUD43_09050	1923835	1924020	hypothetical protein
DUD43_09055	1924358	1925431	nucleoid-associated protein NdpA	specific Mc250
DUD43_09055	1924358	1925431	nucleoid-associated protein NdpA	specific Mc250
DUD43_09065	1926414	1926833	hypothetical protein	specific Mc250
DUD43_09070	1926979	1927701	hypothetical protein
DUD43_09075	1927785	1928201	hypothetical protein
DUD43_09080	1928589	1929428	helix-hairpin-helix domain-containing protein
DUD43_09085	1929440	1929796	hypothetical protein	specific Mc250
DUD43_09090	1929859	1931511	hypothetical protein	specific Mc250
DUD43_09095	1931435	1932811	phage tail tape measure protein
DUD43_09100	1932808	1933275	hypothetical protein
DUD43_09105	1933272	1933754	DUF1833 domain-containing protein
DUD43_09110	1933751	1934152	hypothetical protein
DUD43_09115	1934177	1934773	hypothetical protein	specific Mc250
DUD43_09120	1934822	1937518	hypothetical protein
DUD43_09125	1937575	1939518	SGNH/GDSL hydrolase family protein
DUD43_09130	1939564	1939770	hypothetical protein
DUD43_09135	1940063	1940404	hypothetical protein
DUD43_09140	1940401	1940976	lysozyme
DUD43_09145	1940973	1941221	hypothetical protein
DUD43_09150	1941475	1941990	hypothetical protein	specific Mc250
DUD43_09155	1942087	1942593	hypothetical protein	specific Mc250
DUD43_09160	1942832	1943062	DUF2514 family protein	specific Mc250
DUD43_09165	1943230	1943826	hypothetical protein	specific Mc250
DUD43_09170	1944185	1944490	hypothetical protein	specific Mc250
DUD43_09175	1944754	1945005	hypothetical protein	specific Mc250
DUD43_09180	1945322	1945702	hypothetical protein	specific Mc250
DUD43_09185	1946145	1946630	hypothetical protein	specific Mc250
DUD43_09190	1946889	1947860	hypothetical protein	specific Mc250
DUD43_09195	1947945	1948277	hypothetical protein	specific Mc250
DUD43_09200	1948407	1949027	hemolysin III family protein
DUD43_09205	1949399	1949572	DUF1508 domain-containing protein
DUD43_09210	1949721	1950125	RidA family protein
DUD43_09215	1950412	1950897	hypothetical protein
DUD43_09220	1951073	1951492	GFA family protein
DUD43_09225	1951523	1952062	lipocalin
DUD43_09230	1952232	1953041	amino acid ABC transporter substrate-binding protein
DUD43_09235	1953144	1953881	amino acid ABC transporter permease
DUD43_09240	1953878	1954576	amino acid ABC transporter permease
DUD43_09245	1954573	1955307	amino acid ABC transporter ATP-binding protein
DUD43_09250	1955530	1955808	hypothetical protein
DUD43_09255	1956202	1956555	hypothetical protein
DUD43_09260	1956954	1957289	hypothetical protein	specific Mc250
DUD43_09265	1957324	1959027	AAA family ATPase
DUD43_09270	1959379	1959651	phenol hydroxylase
DUD43_09275	1959675	1960682	phenol hydroxylase
DUD43_09275	1959675	1960682	phenol hydroxylase
DUD43_09285	1960973	1962478	YHS domain-containing protein	specific Mc250
Island 5	1,988,234	2,014,624
GenBank Locus Tag	start	end	annotation	comment
DUD43_09430	1988234	1988758	translation initiation factor IF-3
DUD43_09435	1988887	1989849	glutathione synthase
DUD43_09440	1989846	1990253	PTS sugar transporter subunit IIA
DUD43_09445	1990289	1990558	HPr family phosphocarrier protein
DUD43_09450	1990574	1992331	ptsP
DUD43_09455	1992652	1993137	hypothetical protein
DUD43_09460	1993244	1993531	hypothetical protein
DUD43_09465	1993541	1994773	MFS transporter
DUD43_09470	1994869	1995546	pentapeptide repeat-containing protein
DUD43_09475	1995654	1997186	ATP-binding protein	specific Mc250
DUD43_09480	1997230	1998003	hypothetical protein	specific Mc250
DUD43_09485	1998055	1998834	hypothetical protein	specific Mc250
DUD43_09490	1999483	1999680	50S ribosomal protein L35
DUD43_09495	1999697	2000056	50S ribosomal protein L20
DUD43_09500	2000127	2001149	phenylalanine--tRNA ligase subunit alpha
DUD43_09505	2001227	2003632	phenylalanine--tRNA ligase subunit beta
DUD43_09510	2003642	2003965	integration host factor subunit alpha
DUD43_09515	2004043	2004447	MerR family transcriptional regulator
DUD43_09520	2004516	2005328	DUF455 family protein
DUD43_09525	2005303	2007015	hypothetical protein
DUD43_09530	2007085	2007303	hypothetical protein	specific Mc250
DUD43_09535	2007502	2009283	ABC transporter ATP-binding protein/permease
DUD43_09540	2009344	2009838	SUF system Fe-S cluster assembly regulator
DUD43_09545	2009835	2011283	Fe-S cluster assembly protein SufB
DUD43_09550	2011297	2012076	sufC
DUD43_09555	2012073	2013380	sufD
DUD43_09560	2013377	2014624	cysteine desulfurase	specific Mc250
Island 6	2,185,674	2,204,562
GenBank Locus Tag	start	end	annotation	comment
DUD43_10275	2185674	2187266	multicopper oxidase family protein
DUD43_10280	2187417	2188619	formate-dependent phosphoribosylglycinamide formyltransferase
DUD43_10285	2188638	2189096	hypothetical protein
DUD43_10290	2189201	2190730	pap; polyphosphate:AMP phosphotransferase
DUD43_10295	2191203	2191760	hypothetical protein	specific Mc250
DUD43_10300	2192258	2192761	DUF523 domain-containing protein
DUD43_10305	2192895	2193830	LysR family transcriptional regulator	specific Mc250
DUD43_10310	2194010	2194888	PhzF family phenazine biosynthesis protein	specific Mc250
DUD43_10315	2194900	2195289	RidA family protein	specific Mc250
DUD43_10320	2195467	2196129	hypothetical protein
DUD43_10325	2196615	2197016	GNAT family N-acetyltransferase
DUD43_10330	2197157	2198281	site-specific integrase
DUD43_10335	2198463	2198828	ligand-binding protein SH3	specific Mc250
DUD43_10340	2198999	2199583	hypothetical protein
DUD43_10345	2199798	2200367	cytochrome b
DUD43_10350	2200364	2200927	YceI family protein
DUD43_10355	2200981	2201553	YceI family protein
DUD43_10360	2201585	2201929	arsC; arsenate reductase (glutaredoxin)
DUD43_10365	2202052	2202750	thiol:disulfide oxidoreductase
DUD43_10370	2202763	2203554	DUF3298 domain-containing protein
DUD43_10375	2203723	2204562	DUF2789 family protein	specific Mc250
Island 7	2,894,677	2,916,905
GenBank Locus Tag	start	end	annotation	comment
DUD43_13535	2894677	2896044	nuoF
DUD43_13540	2896041	2896535	NADH-quinone oxidoreductase subunit NuoE
DUD43_13545	2896565	2897818	NADH-quinone oxidoreductase subunit D
DUD43_13550	2897824	2898435	NADH-quinone oxidoreductase subunit C
DUD43_13555	2898462	2898938	NADH-quinone oxidoreductase subunit B
DUD43_13560	2899085	2899444	NADH-quinone oxidoreductase subunit A
DUD43_13565	2899776	2900012	hypothetical protein	specific Mc250
DUD43_13570	2900009	2901136	porin	specific Mc250
DUD43_13575	2901760	2901844	tRNA-Leu
DUD43_13580	2902069	2902476	preprotein translocase subunit SecG
DUD43_13585	2902495	2903235	triose-phosphate isomerase
DUD43_13590	2903395	2904369	NAD(P)H-quinone oxidoreductase
DUD43_13595	2904601	2904690	tRNA-Ser
DUD43_13600	2904703	2904788	tRNA-Leu
DUD43_13605	2904977	2906263	internal stop; amidohydrolase	pseudogene
DUD43_13610	2906755	2908893	pnp; polyribonucleotide nucleotidyltransferase
DUD43_13615	2908983	2909252	30S ribosomal protein S15
DUD43_13620	2909419	2910186	pssA; CDP-diacylglycerol--serine O-phosphatidyltransferase
DUD43_13625	2910724	2911740	ketol-acid reductoisomerase
DUD43_13630	2911956	2912447	acetolactate synthase small subunit
DUD43_13635	2912458	2914179	ilvB; biosynthetic-type acetolactate synthase large subunit
DUD43_13640	2914620	2916905	FUSC family protein	specific Mc250
Island 8	3,000,070	3,023,575
GenBank Locus Tag	start	end	annotation	comment
DUD43_14040	3000070	3002037	alpha/beta hydrolase
DUD43_14045	3002218	3003624	hypothetical protein
DUD43_14050	3003621	3004547	HlyD family secretion protein
DUD43_14055	3004821	3006473	MFS transporter
DUD43_14060	3006470	3007069	TetR/AcrR family transcriptional regulator
DUD43_14065	3007286	3007978	hypothetical protein
DUD43_14070	3007991	3009157	MFS transporter
DUD43_14075	3009220	3009735	MarR family transcriptional regulator
DUD43_14080	3009946	3011139	hypothetical protein	specific Mc250
DUD43_14080	3009946	3011139	hypothetical protein
DUD43_14090	3012496	3013020	damage-inducible protein DinB
DUD43_14095	3013192	3015387	TonB-dependent siderophore receptor
DUD43_14100	3015504	3016682	MFS transporter
DUD43_14105	3016851	3017795	AraC family transcriptional regulator	specific Mc250
DUD43_14110	3018066	3021158	fdnG
DUD43_14115	3021155	3022069	fdxH
DUD43_14120	3022053	3022706	formate dehydrogenase subunit gamma
DUD43_14125	3022703	3023575	fdhE	specific Mc250
Island 9	3,115,500	3,139,081
GenBank Locus Tag	start	end	annotation	comment
DUD43_14500	3115836	3116426	cytochrome c
DUD43_14505	3116423	3117031	cytochrome-c oxidase
DUD43_14510	3117036	3118688	hypothetical protein
DUD43_14515	3118924	3120351	PLP-dependent aminotransferase family protein
DUD43_14520	3120417	3120893	hypothetical protein
DUD43_14525	3120935	3121858	LysR family transcriptional regulator
DUD43_14530	3121959	3123305	aspartate aminotransferase family protein
DUD43_14535	3123464	3124300	murI
DUD43_14540	3124697	3124936	hypothetical protein	specific Mc250
DUD43_14545	3125203	3127281	hypothetical protein	specific Mc250
DUD43_14550	3127303	3127500	hypothetical protein	specific Mc250
DUD43_14555	3127522	3129699	phospholipase C, phosphocholine-specific
DUD43_14560	3129858	3130334	hypothetical protein	specific Mc250
DUD43_14565	3130359	3130907	hypothetical protein
DUD43_14570	3130972	3131745	outer membrane protein assembly factor BamE
DUD43_14575	3131820	3137795	hypothetical protein
DUD43_14580	3137792	3139081	EAL domain-containing protein	specific Mc250
Island 10	3,394,739	3,418,535
GenBank Locus Tag	start	end	annotation	comment
DUD43_15735	3394739	3396043	hypothetical protein
DUD43_15740	3396337	3396954	LysE family translocator
DUD43_15745	3397309	3398166	LysR family transcriptional regulator
DUD43_15750	3398204	3399325	ABC transporter substrate-binding protein
DUD43_15755	3399587	3399910	ArsR family transcriptional regulator
DUD43_15760	3399994	3401283	arsenic transporter
DUD43_15765	3401308	3401739	arsC
DUD43_15770	3401726	3402442	arsH
DUD43_15775	3402759	3403667	AraC family transcriptional regulator	specific Mc250
DUD43_15780	3403738	3403947	hypothetical protein
DUD43_15785	3404175	3404510	hypothetical protein
DUD43_15790	3404531	3404869	hypothetical protein
DUD43_15795	3405229	3405426	hypothetical protein
DUD43_15800	3405436	3406665	aminotransferase class I/II-fold pyridoxal phosphate-dependent enzyme
DUD43_15805	3406673	3407887	MFS transporter
DUD43_15810	3407927	3408649	pyrroloquinoline quinone biosynthesis protein PqqC
DUD43_15815	3408674	3409180	GNAT family N-acetyltransferase
DUD43_15820	3409395	3410387	helix-turn-helix domain-containing protein
DUD43_15825	3410523	3410613	tRNA-Ser
DUD43_15830	3410856	3412004	ribD
DUD43_15835	3412009	3412470	transcriptional repressor NrdR
DUD43_15840	3412507	3413757	serine hydroxymethyltransferase
DUD43_15845	3413941	3414576	YbhB/YbcL family Raf kinase inhibitor-like protein
DUD43_15850	3414596	3415822	tyrosine--tRNA ligase
DUD43_15855	3416065	3417432	M23 family peptidase
DUD43_15860	3417438	3418535	anhydro-N-acetylmuramic acid kinase	specific Mc250
Island 11	3,637,499	3,660,807
GenBank Locus Tag	start	end	annotation	comment
DUD43_16845	3637499	3638818	30S ribosomal protein S12 methylthiotransferase RimO
DUD43_16850	3638980	3639504	gamma carbonic anhydrase family protein
DUD43_16855	3639542	3640549	galE
DUD43_16860	3640673	3641428	Asp/Glu racemase
DUD43_16865	3641706	3642593	LysR family transcriptional regulator
DUD43_16870	3642706	3643512	hpaI
DUD43_16875	3643694	3644425	ABC transporter ATP-binding protein
DUD43_16880	3644413	3645147	ABC transporter permease subunit
DUD43_16885	3645240	3646253	ABC transporter substrate-binding protein
DUD43_16890	3646411	3648294	acyltransferase	specific Mc250
DUD43_16895	3648927	3649913	hypothetical protein	specific Mc250
DUD43_16900	3649974	3651245	sugar transferase
DUD43_16905	3651256	3652062	glycosyltransferase	specific Mc250
DUD43_16905	3651256	3652062	glycosyltransferase	specific Mc250
DUD43_16915	3653249	3654358	glycosyltransferase	specific Mc250
DUD43_16920	3654402	3655526	N-acetyl sugar amidotransferase
DUD43_16925	3655523	3656284	imidazole glycerol phosphate synthase subunit HisF
DUD43_16930	3656281	3656895	hisH
DUD43_16930	3656281	3656895	hisH
DUD43_16940	3658182	3659276	DegT/DnrJ/EryC1/StrS family aminotransferase
DUD43_16945	3659273	3659863	N-acetyltransferase
DUD43_16950	3659860	3660807	gfo/Idh/MocA family oxidoreductase	specific Mc250
Island 12	3,762,379	3,795,565
GenBank Locus Tag	start	end	annotation	comment
DUD43_17370	3762379	3763620	hypothetical protein	specific Mc250
DUD43_17375	3763724	3765271	LTA synthase family protein
DUD43_17380	3765261	3766034	SDR family NAD(P)-dependent oxidoreductase
DUD43_17385	3766021	3767499	glycosyltransferase
DUD43_17390	3767515	3768600	glycosyltransferase family 1 protein
DUD43_17395	3768597	3769913	glycosyltransferase WbuB
DUD43_17400	3769918	3770904	polysaccharide deacetylase
DUD43_17405	3770901	3771860	polysaccharide deacetylase
DUD43_17410	3771911	3773287	glycosyltransferase	specific Mc250
DUD43_17415	3773345	3773731	hypothetical protein
DUD43_17420	3774151	3775668	hypothetical protein
DUD43_17425	3775683	3777602	glycosyltransferase
DUD43_17430	3777681	3778943	UDP-N-acetyl-D-mannosamine dehydrogenase
DUD43_17435	3778958	3780079	UDP-N-acetylglucosamine 2-epimerase (non-hydrolyzing)
DUD43_17440	3780084	3782804	hypothetical protein	specific Mc250
DUD43_17445	3782881	3783966	chain-length determining protein
DUD43_17450	3784065	3784727	ABC transporter ATP-binding protein
DUD43_17455	3784724	3785512	ABC transporter
DUD43_17460	3785555	3786655	polysaccharide export protein
DUD43_17465	3786757	3788097	aminotransferase class I/II-fold pyridoxal phosphate-dependent enzyme
DUD43_17470	3788090	3795565	SDR family NAD(P)-dependent oxidoreductase	specific Mc250
Island 13	3,847,793	3,871,383
GenBank Locus Tag	start	end	annotation	comment
DUD43_17730	3847793	3848560	tatC
DUD43_17735	3848843	3850009	PDZ domain-containing protein
DUD43_17740	3850035	3850811	Nif3-like dinuclear metal center hexameric protein
DUD43_17745	3850993	3851448	large conductance mechanosensitive channel protein MscL
DUD43_17750	3851575	3852219	petA
DUD43_17755	3852270	3853658	cytochrome bc complex cytochrome b subunit
DUD43_17760	3853678	3854532	cytochrome c1
DUD43_17765	3854659	3855267	glutathione S-transferase
DUD43_17770	3855274	3855699	ClpXP protease specificity-enhancing factor
DUD43_17775	3855881	3856726	cysW
DUD43_17780	3856723	3857613	cysT
DUD43_17785	3857617	3858621	sulfate ABC transporter substrate-binding protein
DUD43_17790	3858869	3858944	tRNA-Thr
DUD43_17795	3860062	3861195	hypothetical protein	specific Mc250
DUD43_17800	3861375	3862502	alpha-hydroxy-acid oxidizing protein
DUD43_17805	3862501	3862710	hypothetical protein
DUD43_17810	3862736	3863686	2-hydroxyacid dehydrogenase
DUD43_17810	3862736	3863686	2-hydroxyacid dehydrogenase
DUD43_17820	3864028	3865320	TRAP transporter large permease
DUD43_17825	3865313	3865759	TRAP transporter small permease
DUD43_17830	3865885	3866925	ABC transporter substrate-binding protein
DUD43_17835	3866978	3867925	NAD-dependent epimerase/dehydratase family protein
DUD43_17840	3867929	3868759	hydroxypyruvate isomerase
DUD43_17845	3868773	3869669	NAD(P)-dependent oxidoreductase
DUD43_17850	3869671	3871383	dihydroxy-acid dehydratase	specific Mc250
Island 14	4,110,758	4,135,374
GenBank Locus Tag	start	end	annotation	comment
DUD43_18945	4110758	4111948	tuf; elongation factor Tu
DUD43_18950	4111992	4112066	tRNA-Thr
DUD43_18955	4112105	4112178	tRNA-Gly
DUD43_18960	4112235	4112321	tRNA-Tyr
DUD43_18965	4112921	4113859	ParB/RepB/Spo0J family partition protein
DUD43_18970	4113889	4114704	ParA family protein
DUD43_18975	4114707	4115378	16S rRNA (guanine(527)-N(7))-methyltransferase RsmG
DUD43_18980	4115375	4117291	tRNA uridine-5-carboxymethylaminomethyl(34) synthesis enzyme MnmG
DUD43_18985	4118183	4119355	aminotransferase class I/II-fold pyridoxal phosphate-dependent enzyme
DUD43_18990	4119425	4119922	hypothetical protein	specific Mc250
DUD43_18995	4120524	4121582	metallophosphoesterase
DUD43_19000	4123101	4124468	diguanylate cyclase
DUD43_19005	4124689	4125537	psd; phosphatidylserine decarboxylase
DUD43_19010	4125749	4126729	DUF4105 domain-containing protein
DUD43_19015	4126948	4127865	pyridoxal-phosphate dependent enzyme
DUD43_19020	4128428	4128781	winged helix-turn-helix domain-containing protein
DUD43_19025	4129053	4129841	PhzF family phenazine biosynthesis protein
DUD43_19030	4129986	4131011	hypothetical protein	specific Mc250
DUD43_19035	4131292	4132044	DUF4880 domain-containing protein
DUD43_19040	4132072	4135374	autotransporter outer membrane beta-barrel domain-containing protein
